# Supplementary material for: Dynamic and Static Assembly of Sulfated Cellulose Nanocrystals with Alkali Metal Counter Cations
Source: MDPI journal article supplement (doi:10.3390/nano12183131), 2022-09-09
Supplement: s1 [file s1]

Supplementary Materials

# Dynamic and Static Assembly of Sulfated Cellulose Nanocrystals with Alkali Metal Counter Cations

Patrick Petschacher <sup>1</sup>, Reza Ghanbari <sup>2</sup>, Carina Sampl <sup>1</sup>, Helmar Wiltse <sup>3</sup>, Roland Kádár <sup>2,4</sup>, Stefan Spirk <sup>1,\*</sup> and Tiina Nypelö <sup>4,5,\*</sup>

<sup>1</sup> Institute of Bioproducts and Paper Technology, Graz University of Technology, Inffeldgasse 23, 8010 Graz, Austria

<sup>2</sup> Department of Industrial Materials Science, Chalmers University of Technology, 41296 Gothenburg, Sweden

<sup>3</sup> Institute of Analytical Chemistry and Food Chemistry, Graz University of Technology, 8010 Graz, Austria

<sup>4</sup> Department of Chemistry and Chemical Engineering, Chalmers University of Technology, 41296 Gothenburg, Sweden

<sup>5</sup> Wallenberg Wood Science Center, Chalmers University of Technology, 41296 Gothenburg, Sweden

\* Correspondence: stefan.spirk@tugraz.at (S.S.); tiina.nypelo@chalmers.se (T.N.)

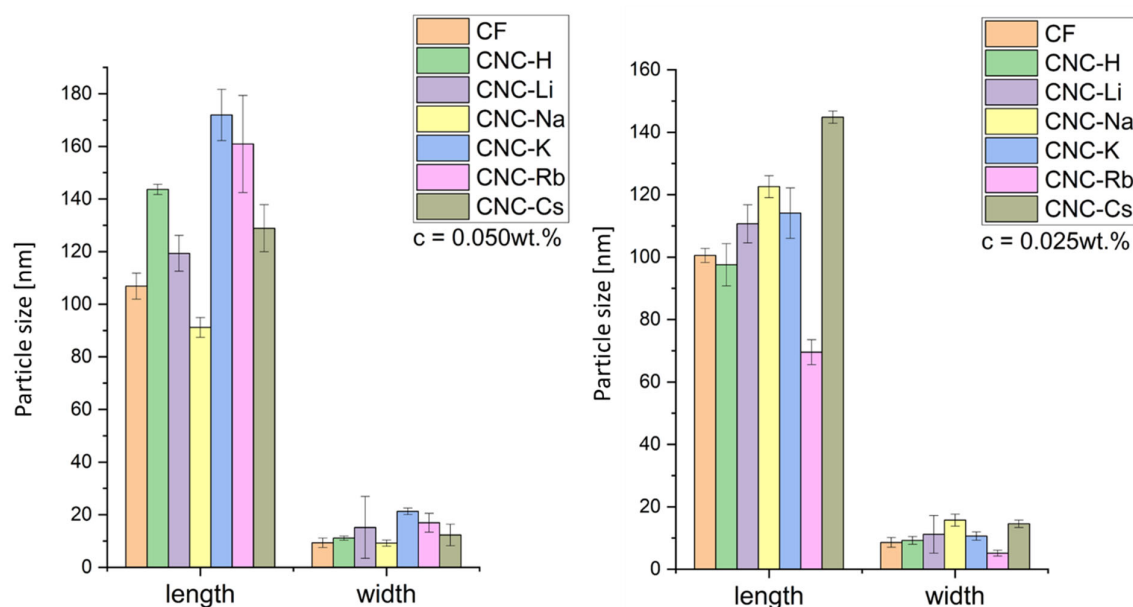

**Figure S1.** Hydrodynamic diameter of M-CNC water suspensions determined by dynamic light scattering.

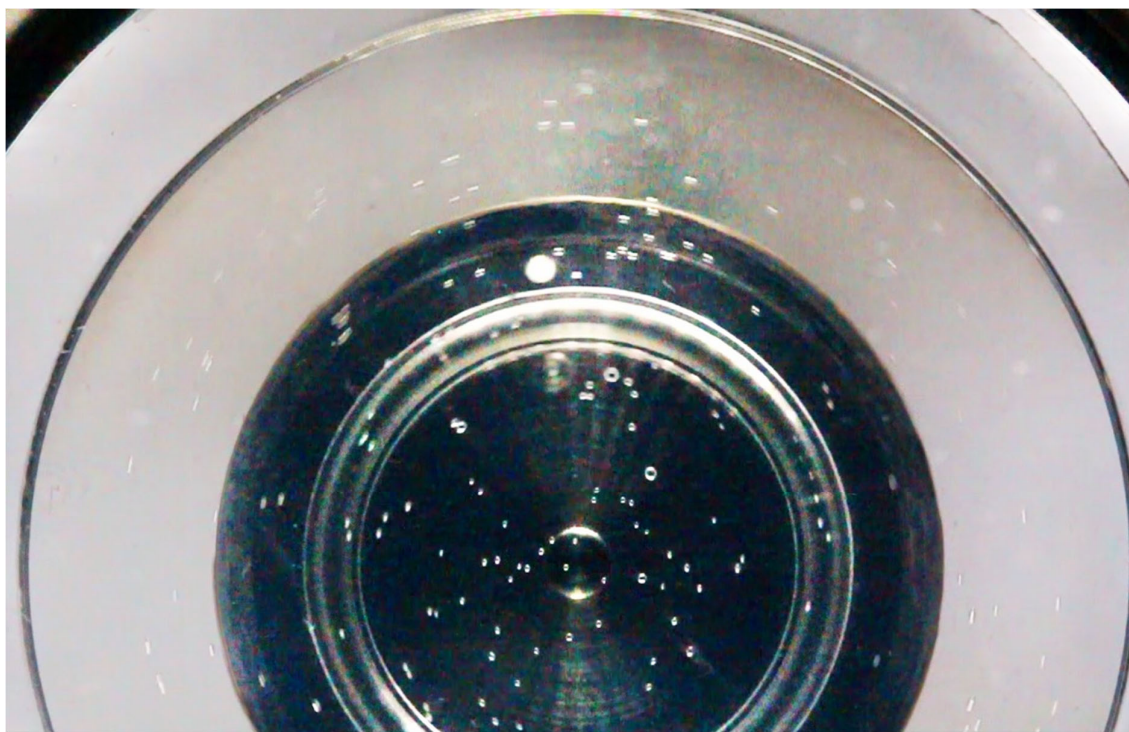

**Figure S2.** PLI visualization of K-CNC at 100 s<sup>-1</sup> in a zoomed-out version proving the absence of a flow-induced Maltese-cross pattern.

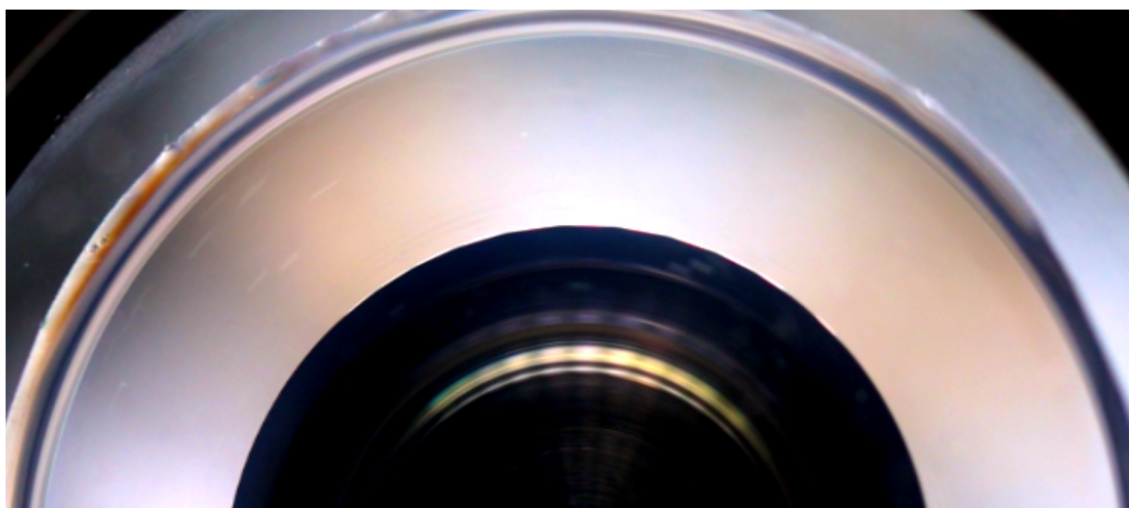

**Figure S3.** PLI visualization of Cs-CNC at 100 s<sup>-1</sup> in a zoomed-out version proving the presence of a flow-induced Maltese-cross pattern.

**Table S1.** Atomic composition (at.%) of the CNCs determined using XPS.

|        | C1s   | O1s   | Si2p | S2p  | Na1s | K2p  | Rb3d | Cs3d |
|--------|-------|-------|------|------|------|------|------|------|
| H-CNC  | 53.61 | 41.54 | 4.42 | 0.43 |      |      |      |      |
| Na-CNC | 57.19 | 41.50 |      | 0.37 | 0.94 | -    |      |      |
| K-CNC  | 58.65 | 40.77 |      | 0.35 |      | 0.23 |      |      |
| Rb-CNC | 58.48 | 40.92 |      | 0.37 |      |      | 0.23 |      |
| Cs-CNC | 57.87 | 40.49 | 1.01 | 0.42 |      |      |      | 0.20 |

**Table S2.** Comparison of XPS binding energies of metal sulfates from Wahlqvist et al. [1] with the alkali metal cation modified M-CNC.

|                                     | Li1s | Na1s   | K2p <sub>3/2</sub> | Rb3d <sub>5/2</sub> | Cs3d <sub>5/2</sub> |
|-------------------------------------|------|--------|--------------------|---------------------|---------------------|
| M <sub>2</sub> SO <sub>4</sub> [eV] | 56.1 | 1071.6 | 293.0              | 109.8               | 724.3               |
| M-CNC [eV]                          | n.d. | 1072.0 | 293.1              | 110.0               | 724.7               |

## References

- [1] Wahlqvist, M.; Shchukarev, A. XPS spectra and electronic structure of Group IA sulfates. *J. Electron Spectrosc. Relat. Phenom.* **2007**, *156*, 310–314. <https://doi.org/10.1016/j.elspec.2006.11.032>.
